# Supplementary material for: Automated Sagittal Skeletal Classification of Children Based on Deep Learning
Source: MDPI journal article supplement (doi:10.3390/diagnostics13101719), 2023-05-12
Supplement: s1 [file s1]

# Automated Sagittal Skeletal Classification of Children Based on Deep Learning

Lan Nan, Min Tang, Bohui Liang, Shuixue Mo, Na Kang, Shaohua Song, Xuejun Zhang and Xiaojuan Zeng

## Appendix

### Methods Details

#### Model Training Details

The structure of model layers and hyperparameters were optimized to efficiently combine and analyze the features from the cephalogram information. Pytorch was used as the framework and was trained using SGD optimizer, with cosine learning rate decay and standard parameters (momentum = 0.9, weight decay = 0.05, learning rate = 0.0001). For label distribution learning, the hyperparameters as follows:  $\sigma = 0.7$ ,  $d_1 = 2$ ,  $d_2 = 0.5$ .

#### Statistical Analysis

Confusion matrices, diagnostic accuracy, sensitivity, specificity, the receiver operating characteristic (ROC) curves, and the area under the curve (AUC) were used to test the system performance. We run each method with 5-fold cross-validation and report the average, standard deviation. The following algorithms were used for the calculation of accuracy, sensitivity, and specificity (Memar and Faradji 2018):

$$\text{Accuracy (AC)} = (\text{TP} + \text{TN}) / (\text{TP} + \text{FN} + \text{TN} + \text{FP}) (\%)$$

$$\text{Sensitivity (SN)} = \text{TP} / (\text{TP} + \text{FN}) (\%)$$

$$\text{Specificity (SP)} = \text{TN} / (\text{TN} + \text{FP}) (\%)$$

WHERE TP denotes true positives, TN denotes true negatives, FP denotes false positives, and FN denotes false negatives.

The ROC curves and the AUCs were calculated for each skeletal class. Two types of averages: micro-average and macro-average were used in this work (Yang 1999). AUC is an effective and comprehensive measure of sensitivity and specificity for assessing the inherent validity of a diagnostic test and the overall performance of the ROC curve. Additionally, high AUC values confirm the accuracy by which the model can distinguish patients with or without diseases from a wide range of operating points.

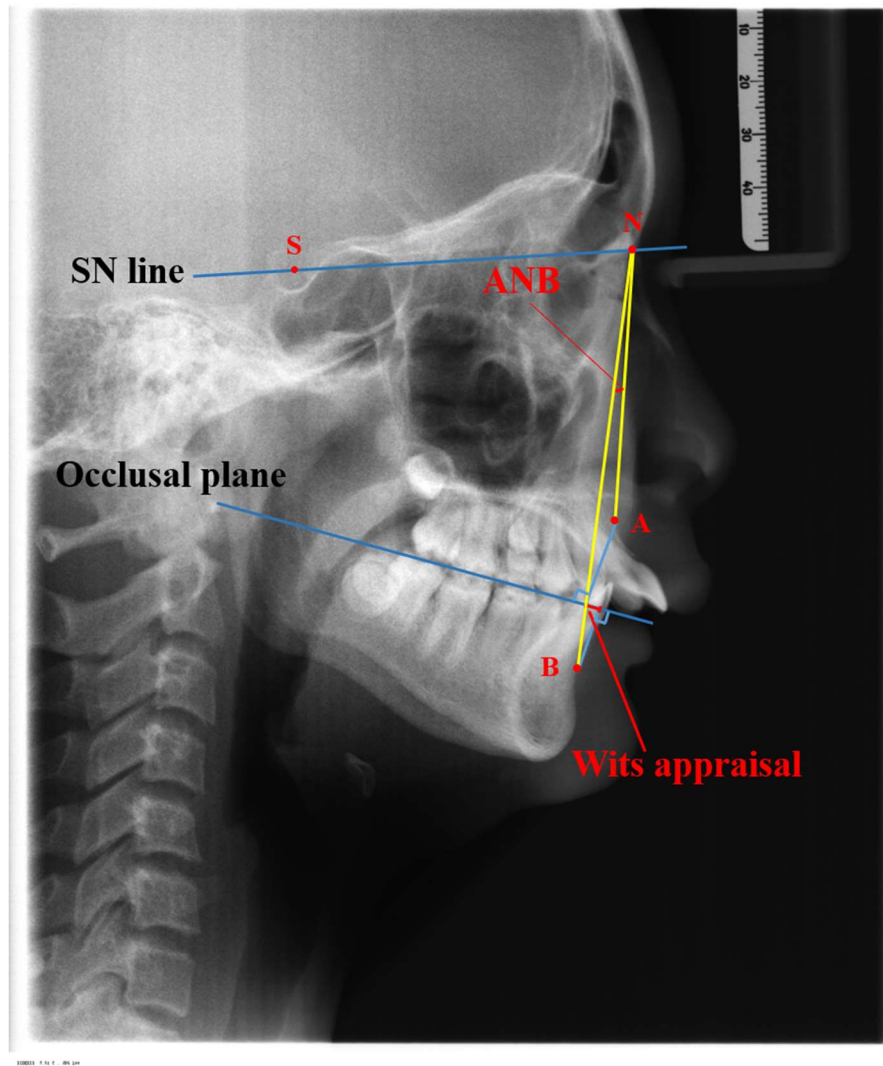

**Figure S1.** Cephalometric analysis used in this study. Landmarks. S, sella; N, nasion; A, subspinale; B, supramentale. ANB and Wits appraisal are described in the figure.

**Table S1.** The gender, age, ANB angle and wits value of the three sagittal skeletal classifications.

| Parameters             | Class I (n = 501)  | Class II (n = 612) | Class III (n = 500) | Total (n = 1613)   | <i>p</i> |
|------------------------|--------------------|--------------------|---------------------|--------------------|----------|
| Gender (n)             |                    |                    |                     |                    |          |
| Male                   | 249                | 302                | 246                 | 797                |          |
| Female                 | 252                | 310                | 254                 | 816                |          |
| Age (y, mean $\pm$ SD) | 11.81 $\pm$ 1.76   | 11.53 $\pm$ 1.68   | 10.58 $\pm$ 2.24    | 11.28 $\pm$ 1.97   |          |
| ANB angle (°)          | 2.48 $\pm$ 1.55    | 5.58 $\pm$ 1.77    | (-1.85) $\pm$ 2.89  | 2.30 $\pm$ 3.86    | <0.001   |
| WITS (mm)              | (-1.27) $\pm$ 2.74 | 2.61 $\pm$ 2.79    | (-6.70) $\pm$ 3.51  | (-1.49) $\pm$ 5.02 | <0.001   |

**Table S2.** The gender, age, ANB angle and wits value of the borderline cases.

| Parameters             | Class I tendency (n = 65) | Class II tendency (n = 103) | Class III tendency (n = 22) | Total (n = 190)    |
|------------------------|---------------------------|-----------------------------|-----------------------------|--------------------|
| Gender (n)             |                           |                             |                             |                    |
| Male                   | 31                        | 54                          | 12                          | 97                 |
| Female                 | 34                        | 49                          | 10                          | 93                 |
| Age (y, mean $\pm$ SD) | 10.61 $\pm$ 2.55          | 11.31 $\pm$ 2.36            | 8.95 $\pm$ 2.98             | 10.81 $\pm$ 2.61   |
| ANB angle (°)          | 1.76 $\pm$ 1.50           | 4.23 $\pm$ 0.75             | (-0.08) $\pm$ 1.74          | 2.94 $\pm$ 1.93    |
| WITS (mm)              | (-3.60) $\pm$ 3.63        | 1.06 $\pm$ 2.45             | (-5.51) $\pm$ 4.97          | (-1.24) $\pm$ 4.17 |

### Hyper Parameter Setting

|                        |                  |
|------------------------|------------------|
| Image size             | 224 × 224        |
| batch size             | 64               |
| training epochs        | 200/150          |
| optimizer              | SGD              |
| drop rate              | 0.2/0.0          |
| learning rate schedule | Cosine Annealing |
| base learning rate     | 3e-4/1e-4        |
| weight decay           | 0.05             |
| $\sigma$               | 0.8              |
| $d_1$                  | 5                |
| $d_2$                  | 0.5              |

### Average performance comparison in standard metrics of average ACC and average AUC over all-dataset

| Model          | Image Size       | Params (M) | FLOPS (G) | AUC Value    | ACC(%)       |
|----------------|------------------|------------|-----------|--------------|--------------|
| ResNet-101 [1] | 224 <sup>2</sup> | 44.5       | 7.8       | 78.81 ± 1.54 | 62.30 ± 2.67 |
| DenseNet-121   | 224 <sup>2</sup> | 8.0        | 2.83      | 95.57 ± 0.51 | 85.49 ± 1.36 |
| Swin-T [3]     | 224 <sup>2</sup> | 28.3       | 4.49      | 96.80 ± 0.39 | 85.49 ± 0.89 |
| ConvNeXt-T     | 224 <sup>2</sup> | 28.6       | 4.46      | 96.00 ± 0.39 | 86.30 ± 1.31 |

### References

1. Memar, P.; Faradji, F. A novel multi-class EEG-based sleep stage classification system. *IEEE Trans. Neural Syst. Rehabil. Eng.* 2017, 26, 84–95.
2. Yang, Y. An evaluation of statistical approaches to text categorization. *Inf. Retr.* 1999, 1, 69–90.
3. He, K.; Zhang, X.; Ren, S.; Sun, J. Deep residual Learning for Image Recognition. In *Proceedings of the IEEE Conference on Computer Vision and Pattern Recognition*, Las Vegas, NV, USA, 26–30 July 2016; pp. 770-778.
4. Liu, Z.; Lin, Y.; Cao, Y.; Hu, H.; Wei, Y.; Zhang, Z.; Lin, S.; Guo, B. Swin transformer: Hierarchical vision transformer using shifted windows. In *Proceedings of the IEEE/CVF International Conference on Computer Vision*, Montreal, BC, Canada, 11–17 October 2021; pp. 10012–10022.
